# Supplementary material for: Noncovalent interactions of antitumor cycloplatinated complexes containing trifluoroacetate ligands as the leaving group with bovine serum albumin. Implications for drug design
Source: Royal Society of Chemistry journal article supplement (doi:10.1039/d3nj00867c), 2023-01-01
Supplement: d3nj00867c1.pdf [file d3nj00867c1.pdf]

## Noncovalent interactions of antitumor cycloplatinated complexes containing trifluoroacetate ligand as leaving group with bovine serum albumin. Implications for drug design

Marzieh Dadkhah Aseman,<sup>\*,a,†</sup> Parisa Negaresh,<sup>b,†</sup> Zahra Shojaeifard,<sup>b</sup> Bahram Hemmateenejad,<sup>b</sup> and S. Masoud Nabavizadeh<sup>\*,b</sup>

<sup>a</sup>Department of Chemistry, Faculty of Sciences, Tarbiat Modares University, Tehran, Iran <sup>b</sup>Department of Chemistry, College of Sciences, Shiraz University, Shiraz, Iran,

### Table of Contents

|                                                                                                                                                                                                                                                                                                                                                         |            |
|---------------------------------------------------------------------------------------------------------------------------------------------------------------------------------------------------------------------------------------------------------------------------------------------------------------------------------------------------------|------------|
| <b>Figure S1.</b> Changes in <sup>1</sup> H NMR spectrum of complex <b>1</b> (0.01 M) during its reaction with 10-fold excess of dimethyl sulfoxide-d <sub>6</sub> (0.1 M) in CDCl <sub>3</sub> . (A) Pure <b>1</b> , (B) 10 min (C) 1 h and (D) 24 h after addition of DMSO.                                                                           | <b>S3</b>  |
| <b>Figure S2:</b> The changes in UV/Vis spectra of (A) complex <b>1</b> (3×10 <sup>-4</sup> M) and (B) complex <b>2</b> (3×10 <sup>-4</sup> M) in CHCl <sub>3</sub> after the addition of 10-fold excess of DMSO.                                                                                                                                       | <b>S4</b>  |
| <b>Figure S3.</b> Changes in UV/Vis spectra of (A) complex <b>1</b> (90 μM) and (B) complex <b>2</b> (75 μM) in 10 % v/v DMSO/H <sub>2</sub> O solution.                                                                                                                                                                                                | <b>S4</b>  |
| <b>Figure S4.</b> Changes in the fluorescence spectra of BSA upon titration with <b>1</b> at (A) 303 K, (B) 310 K and (C) 313 K. The concentration of BSA is 0.1 × 10 <sup>-6</sup> mol L <sup>-1</sup> and <b>1</b> , concentration was varied from (a) 0.00 to (i) 0.15 × 10 <sup>-6</sup> mol L <sup>-1</sup> ; pH 7.4 and λ <sub>ex</sub> : 280 nm. | <b>S5</b>  |
| <b>Figure S5.</b> Changes in the fluorescence spectra of BSA upon titration with <b>2</b> at (A) 303 K (B) 310 K and (C) 313 K. The concentration of BSA is 0.1 × 10 <sup>-6</sup> mol L <sup>-1</sup> and <b>2</b> , concentration was varied from (a) 0.00 to (i) 0.15 × 10 <sup>-6</sup> mol L <sup>-1</sup> ; pH 7.4 and λ <sub>ex</sub> : 280 nm.  | <b>S5</b>  |
| <b>Figure S6.</b> Fluorescence emission spectra of <b>2</b> , 0.15 μM(A) 1.5 μM,(B) and 2-phenylpyridine, 0.15 μM (C), T = 298 K, pH = 7.40, λ <sub>ex</sub> = 280 nm, in 0.1M Tris-HCl.                                                                                                                                                                | <b>S5</b>  |
| <b>Figure S7.</b> Van't Hoff plot obtained from the interaction between BSA and complex <b>1</b> (A) and <b>2</b> (B).                                                                                                                                                                                                                                  | <b>S6</b>  |
| <b>Figure S8.</b> Effects of Pt(II) complexes <b>1</b> or <b>2</b> , on two BSA-site marker probes systems. [BSA] = [warfarin] = [ibuprofen] = 0.1 μM; the concentration of Pt(II) complexes was varying from 0.0 (a) to 0.15 (i) μM, λ <sub>ex</sub> = 280 nm.                                                                                         | <b>S6</b>  |
| <b>Figure S9.</b> The modified Stern–Volmer plots of (A) BSA-warfarin and (B) BSA-ibuprofen in the presence of various concentration of Pt(II) complex <b>1</b> , at 310 K. λ <sub>ex</sub> = 280 nm; pH = 7.4, [HSA] = [warfarin or ibuprofen] = 0.1 μM. <b>1</b> Concentration was from 0.0 to 0.15 μM.                                               | <b>S7</b>  |
| <b>Figure S10.</b> The modified Stern–Volmer plots of (A) BSA-warfarin and (B) BSA-ibuprofen in the presence of various concentration of Pt(II) complex <b>2</b> , at 310 K. λ <sub>ex</sub> = 280 nm; pH = 7.4, [HSA] = [warfarin or ibuprofen] = 0.1 μM. <b>2</b> Concentration was from 0.0 to 0.15 μM.                                              | <b>S7</b>  |
| <b>Figure S11.</b> Effect of <b>1</b> (A) and <b>2</b> (B) to warfarin–BSA system (λ <sub>ex</sub> = 310 nm). [warfarin] = [BSA] = 0.1 μM; <b>1</b> and <b>2</b> concentrations were from (a) 0.0 to (i) 0.15 μM, λ <sub>ex</sub> = 310 nm.                                                                                                             | <b>S8</b>  |
| <b>Table S1.</b> List of cycloplatinated complexes and their Log K <sub>b</sub> analyzed in this work.                                                                                                                                                                                                                                                  | <b>S8</b>  |
| <b>Figure S12.</b> <sup>1</sup> H NMR of complex <b>1</b> in CDCl <sub>3</sub> .                                                                                                                                                                                                                                                                        | <b>S9</b>  |
| <b>Figure S13.</b> <sup>1</sup> H NMR of complex <b>2</b> in CDCl <sub>3</sub> .                                                                                                                                                                                                                                                                        | <b>S9</b>  |
| <b>Figure S14.</b> Structure of complex <b>1</b>                                                                                                                                                                                                                                                                                                        | <b>S10</b> |

|                                                                                                                                                              |            |
|--------------------------------------------------------------------------------------------------------------------------------------------------------------|------------|
| <b>Figure S15.</b> $^{19}\text{F}$ NMR of complex <b>2</b> in DMSO- $\text{d}_6$ .                                                                           | <b>S10</b> |
| <b>Figure S16.</b> The changes in $^{19}\text{F}$ NMR spectrum of <b>2</b> (0.01 M) in DMSO (A) and in 10% DMSO/ $\text{H}_2\text{O}$ solution after (B) 2h. | <b>S11</b> |

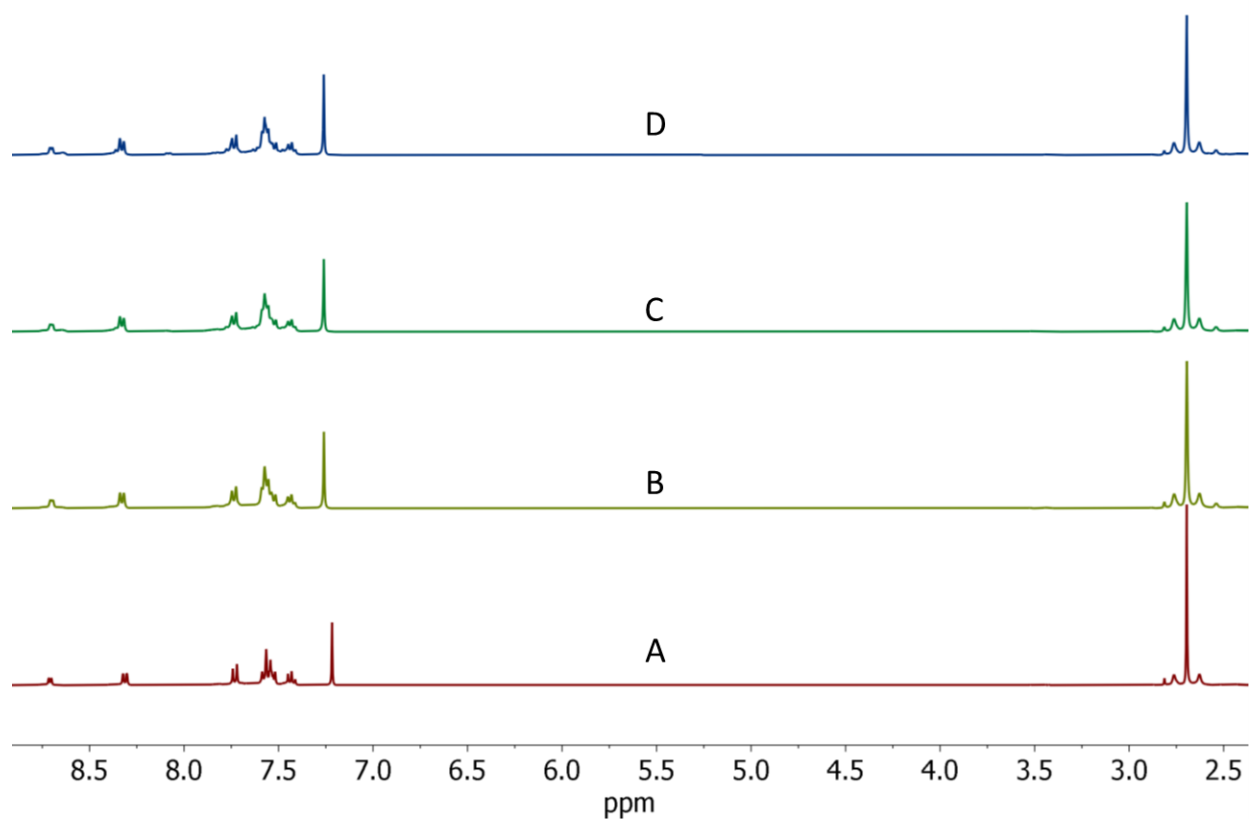

**Figure S1.** Changes in  $^1\text{H}$  NMR spectrum of complex **1** (0.01 M) during its reaction with 10-fold excess of dimethyl sulfoxide- $\text{d}_6$  (0.1 M) in  $\text{CDCl}_3$ . (A) Pure **1**, (B) 10 min (C) 1 h and (D) 24 h after addition of DMSO.

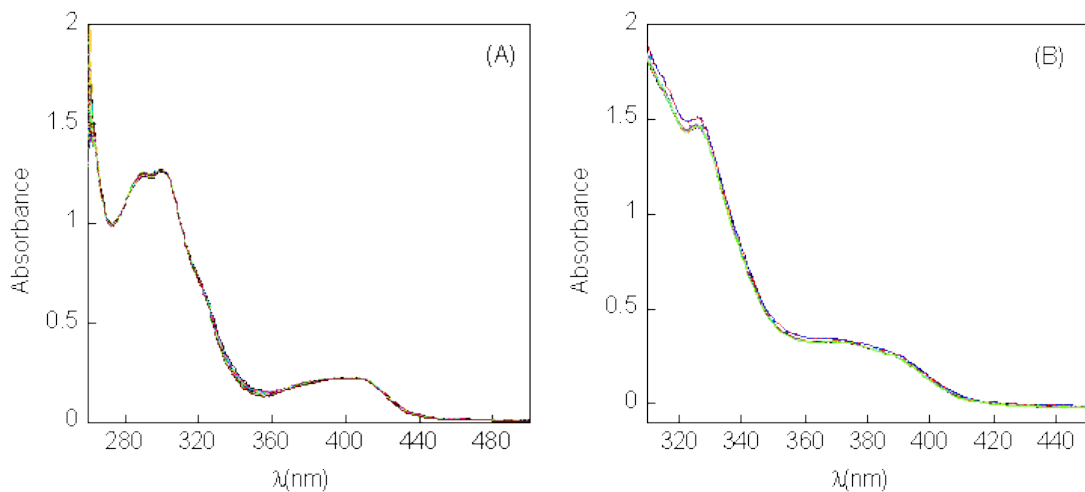

**Figure S2.** The changes in UV/Vis spectra of (A) complex 1 ( $3 \times 10^{-4}$  M) and (B) complex 2 ( $3 \times 10^{-4}$  M) in  $\text{CHCl}_3$  after the addition of 10-fold excess of DMSO (3.0 mM).

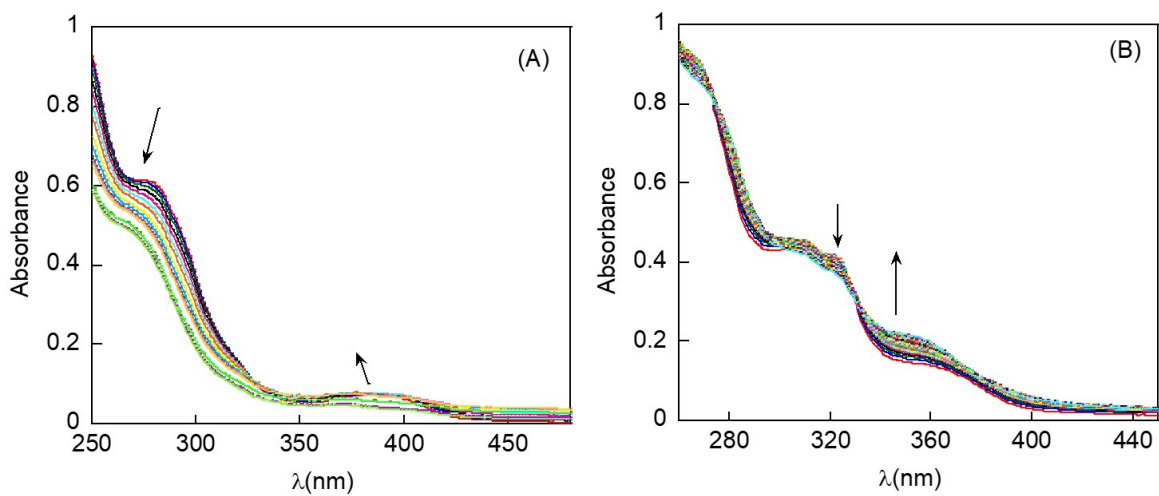

**Figure S3.** Changes in UV/Vis spectra of (A) complex 1 (90  $\mu\text{M}$ ) and (B) complex 2 (75  $\mu\text{M}$ ) in 10 % v/v DMSO/ $\text{H}_2\text{O}$  solution for 5 h.

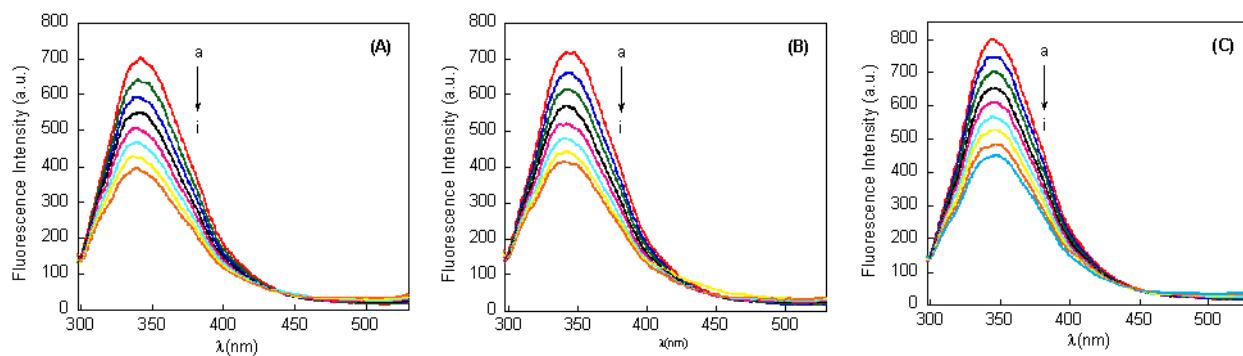

**Figure S4.** Changes in the fluorescence spectra of BSA upon titration with **1** at (A) 303 K, (B) 310 K and (C) 313 K. The concentration of BSA is  $0.1 \times 10^{-6}$  M and **1** concentration was varied from (a) 0.00 to (i)  $0.15 \times 10^{-6}$  M; pH 7.4 and  $\lambda_{\text{ex}}$ : 280 nm.

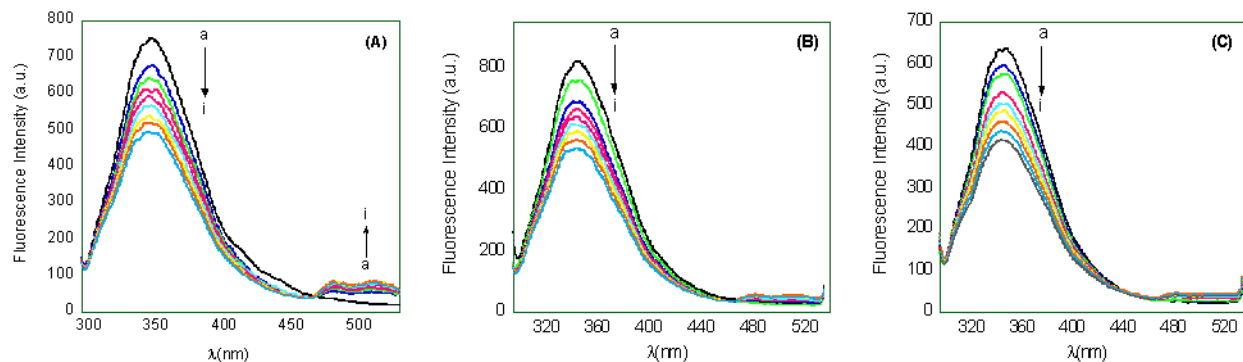

**Figure S5.** Changes in the fluorescence spectra of BSA upon titration with **2** at (A) 303 K, (B) 310 K and (C) 313 K. The concentration of BSA is  $0.1 \times 10^{-6}$  M and **2**, concentration was varied from (a) 0.00 to (i)  $0.15 \times 10^{-6}$  M; pH 7.4 and  $\lambda_{\text{ex}}$ : 280 nm.

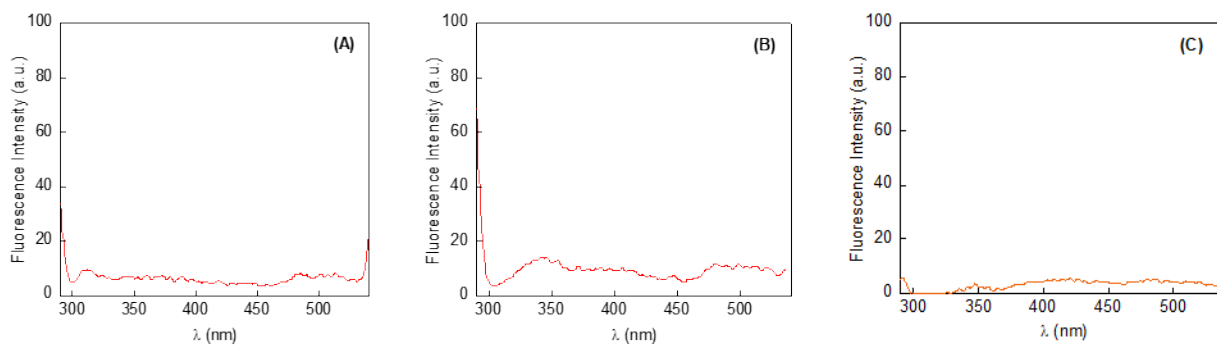

**Figure S6.** Fluorescence emission spectra of **2**, 0.15  $\mu\text{M}$ (A) 1.5  $\mu\text{M}$ (B) and 2-phenylpyridine, 0.15  $\mu\text{M}$  (C), T = 298 K, pH = 7.40,  $\lambda_{\text{ex}}$  = 280 nm, in 0.1M Tris-HCl.

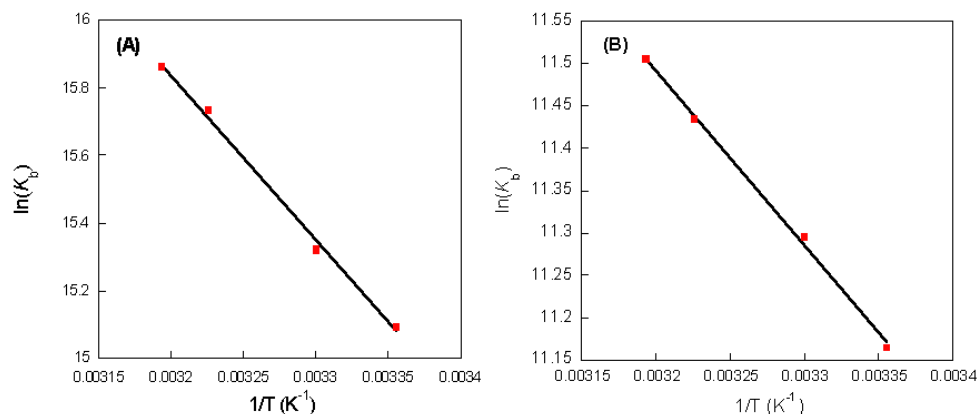

**Figure S7.** Van't Hoff plot obtained from the interaction between BSA and complex 1 (A) and 2 (B).

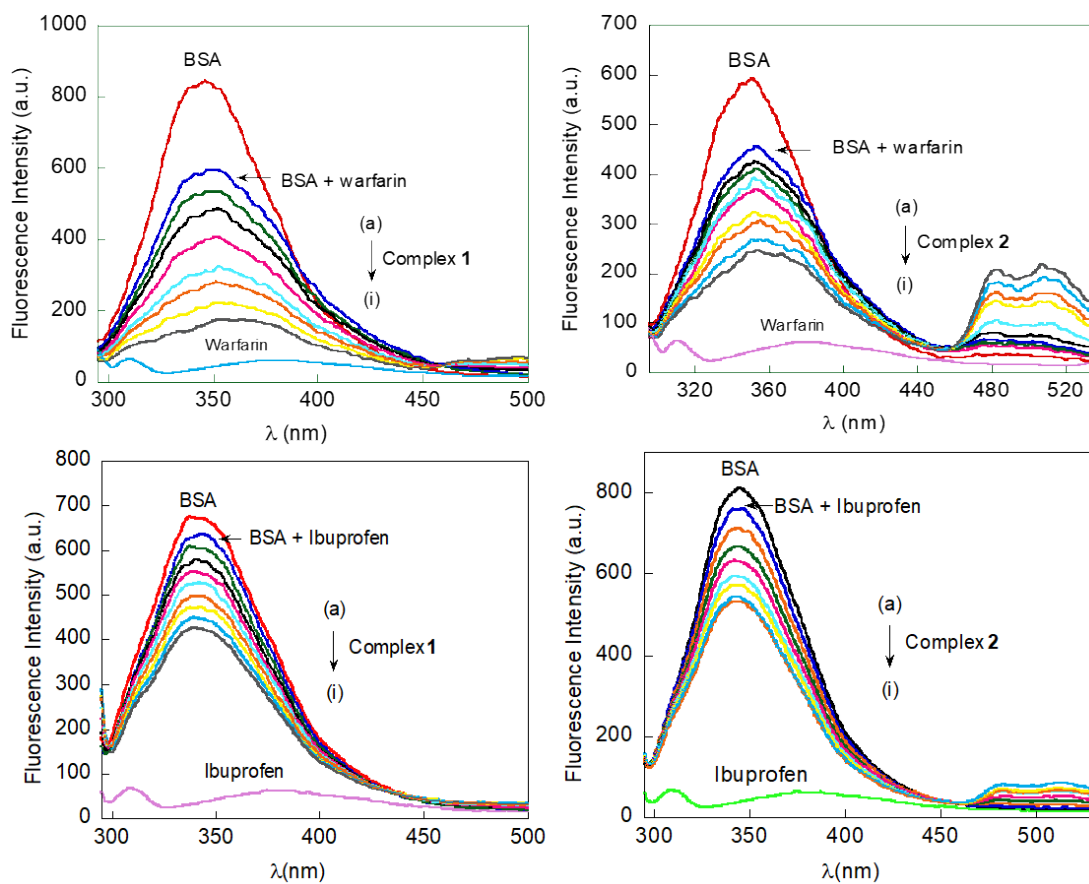

**Figure S8.** Effects of Pt(II) complexes 1 or 2, on two BSA-site marker probes systems.  $[BSA] = [warfarin] = [ibuprofen] = 0.1 \mu M$ ; the concentration of Pt(II) complexes was varying from 0.0 (a) to 0.15 (i)  $\mu M$ ,  $\lambda_{ex} = 280$  nm.

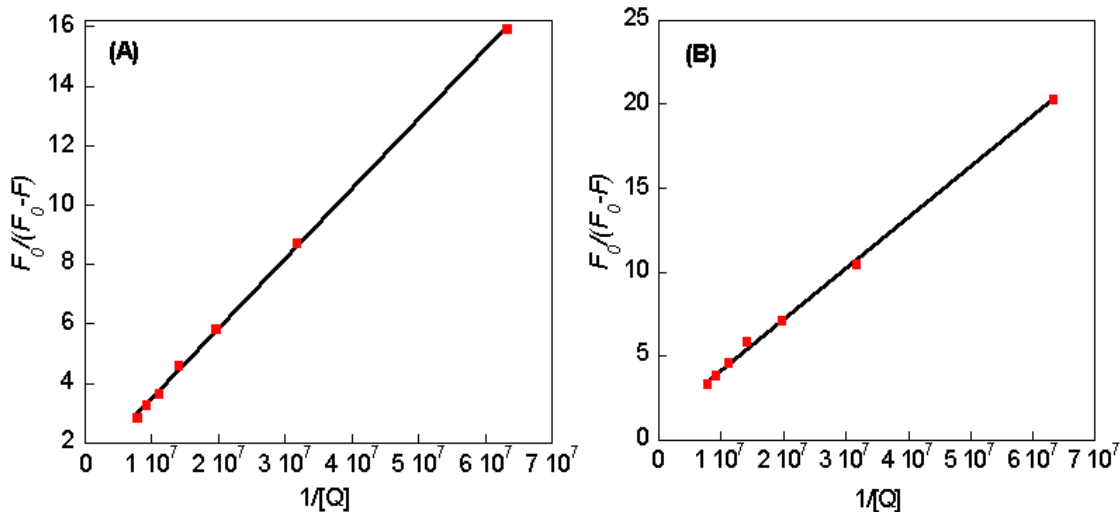

**Figure S9.** The modified Stern–Volmer plots of (A) BSA-warfarin and (B) BSA-ibuprofen in the presence of various concentration of Pt(II) complex **1**, at 310 K.  $\lambda_{\text{ex}} = 280$  nm; pH = 7.4, [HSA] = [warfarin or ibuprofen] = 0.1  $\mu\text{M}$ . **1** Concentration was from 0.0 to 0.15  $\mu\text{M}$ .

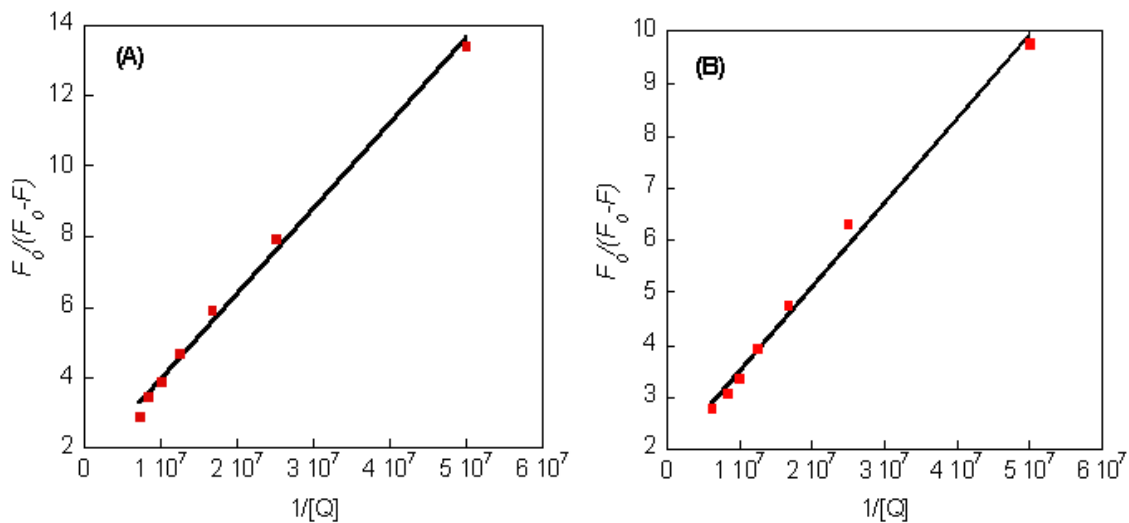

**Figure S10.** The modified Stern–Volmer plots of (A) BSA-warfarin and (B) BSA-ibuprofen in the presence of various concentration of Pt(II) complex **2**, at 310 K.  $\lambda_{\text{ex}} = 280$  nm; pH = 7.4, [HSA] = [warfarin or ibuprofen] = 0.1  $\mu\text{M}$ . **2** Concentration was from 0.0 to 0.15  $\mu\text{M}$ .

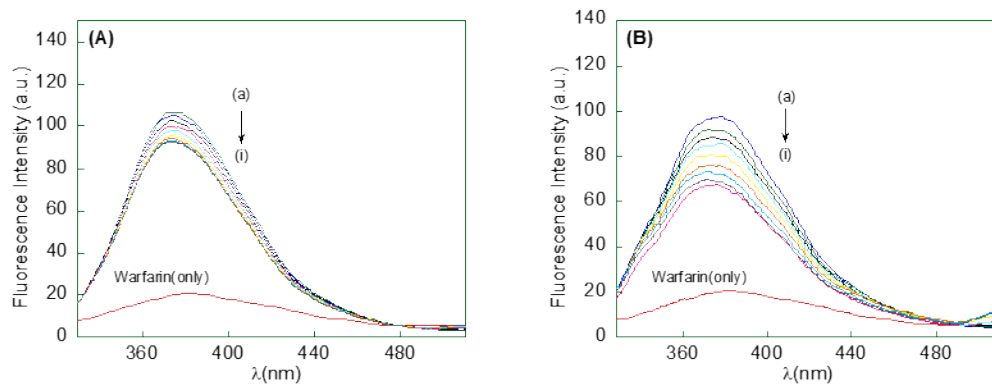

**Figure S11.** Effect of **1** (A) and **2** (B) to warfarin–BSA system ( $\lambda_{\text{ex}} = 310 \text{ nm}$ ).  $[\text{warfarin}] = [\text{BSA}] = 0.1 \mu\text{M}$ ; **1** and **2** concentrations were from (a) 0.0 to (i)  $0.15 \mu\text{M}$ ,  $\lambda_{\text{ex}} = 310 \text{ nm}$ .

**Table S1.** List of cycloplatinated complexes and their  $\text{Log } K_b$  analyzed in this work

| Comp                 | Structure | $\text{Log } K_b$ | Comp                  | Structure | $\text{Log } K_b$ | Comp                  | Structure | $\text{Log } K_b$ |
|----------------------|-----------|-------------------|-----------------------|-----------|-------------------|-----------------------|-----------|-------------------|
| <b>C1 = 1</b>        |           | 6.55              | <b>C6</b><br>Ref: 45  |           | 4.56              | <b>C11</b><br>Ref: 48 |           | 5.51              |
| <b>C2 = 2</b>        |           | 4.84              | <b>C7</b><br>Ref: 47  |           | 5.16              | <b>C12</b><br>Ref: 13 |           | 5.48              |
| <b>C3</b><br>Ref:46  |           | 0.11              | <b>C8</b><br>Ref: 45  |           | 4.82              | <b>C13</b><br>Ref: 49 |           | 7.02              |
| <b>C4</b><br>Ref:46  |           | 0.65              | <b>C9</b><br>Ref: 13  |           | 5.78              | <b>C14</b><br>Ref: 49 |           | 5.13              |
| <b>C5</b><br>Ref: 47 |           | 5.14              | <b>C10</b><br>Ref: 48 |           | 5.47              |                       |           |                   |



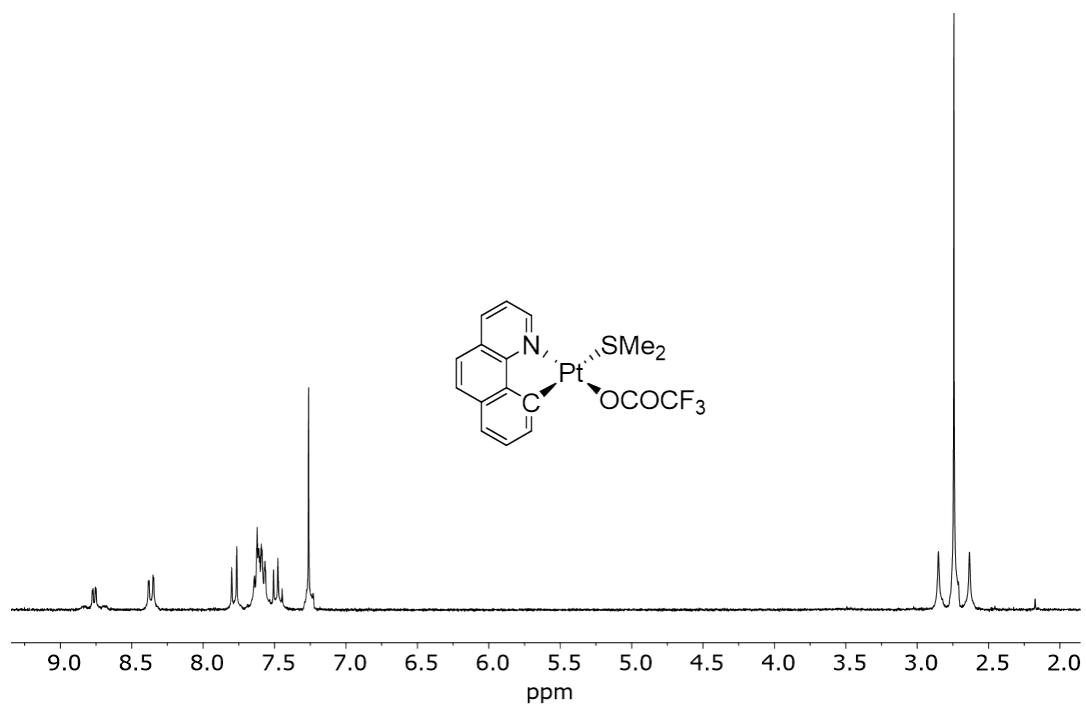

Figure S12. <sup>1</sup>H NMR of complex 1 in CDCl<sub>3</sub>.

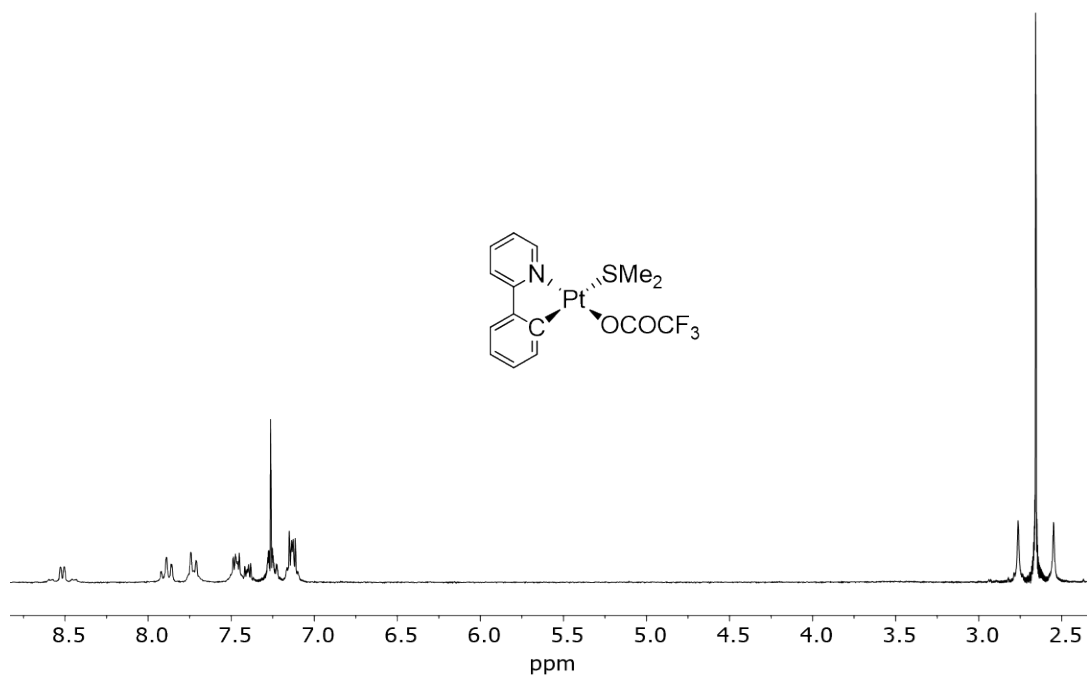

Figure S13. <sup>1</sup>H NMR of complex 2 in CDCl<sub>3</sub>.

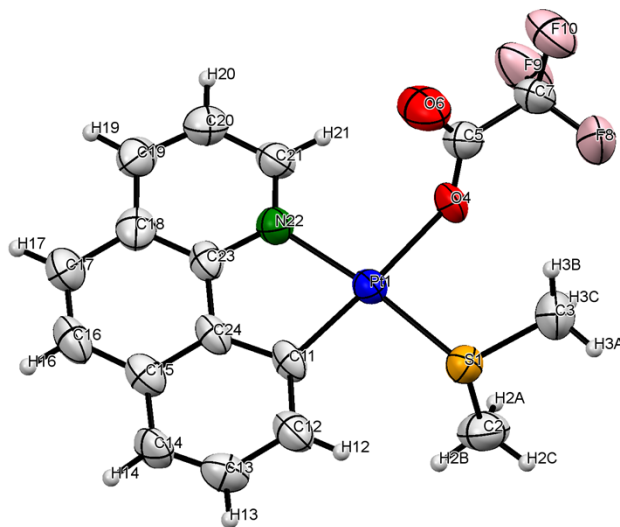

**Figure S14.** Structure of complex 1 (see ref. 42). Selected geometrical parameters ( $\text{\AA}$ ,  $^\circ$ ): Pt1–O4 2.113(5); Pt1–C11 1.972(8); Pt1–N22 2.062(8); Pt1–S1 2.263(3); O(4)–C(5) 1.265(17); O(6)–C(5) 1.223(15); N22–Pt1–O4 94.9(5); N22–Pt1–C11 82.0(6); O4–Pt1–S1 91.6(4); C11–Pt1–S1 91.5(5); S(1)–Pt(1)–N(22) 173.4(2); O(4)–Pt(1)–C(11) 176.8(8).

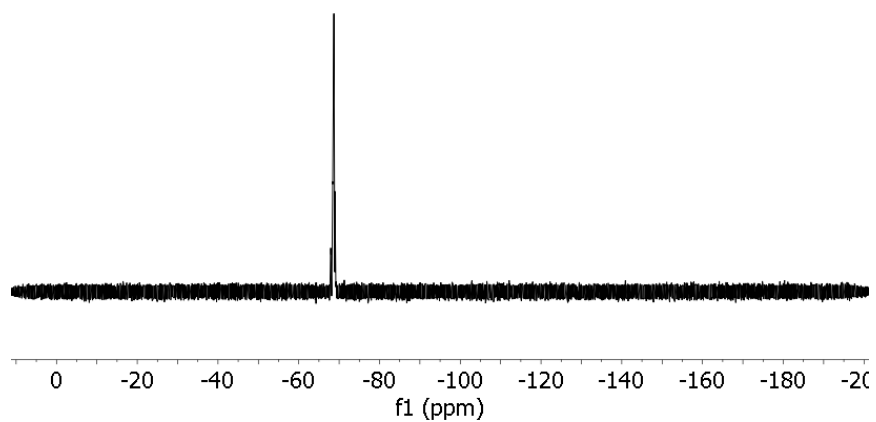

**Figure S15.**  $^{19}\text{F}$  NMR of complex 2 in  $\text{DMSO-d}_6$ .

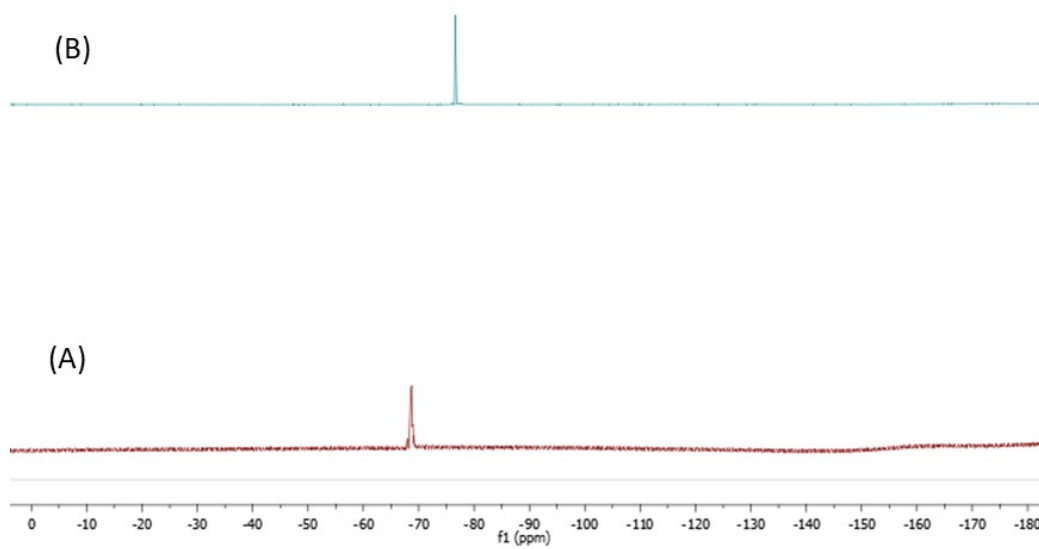

**Figure S16.** The changes in  $^{19}\text{F}$  NMR spectrum of **2** (0.01 M) in DMSO (A) and in 10% DMSO/ $\text{H}_2\text{O}$  solution after (B) 2h.
